# Supplementary material for: Potential of dynamic bacterial communities in the bio-corrosion process: a proof study with surface morphology of metal coupons
Source: RSC Adv. 2019 May 31;9(30):17040–50. doi: 10.1039/c9ra01959f (PMC9064554; doi:10.1039/c9ra01959f)
Supplement: RA-009-C9RA01959F-s001 [file RA-009-C9RA01959F-s001.pdf]

### **Supplementary file**

Table S1: Physico-chemical analysis of biotic sample

| <b>Test parameters</b>             | <b>Methods</b>         | <b>Observation</b>         |
|------------------------------------|------------------------|----------------------------|
| pH                                 | EPA 9040 C             | 6.34 ±0.20                 |
| Conductivity µS/cm                 | EPA 9050 A             | 43.4 ±0.12                 |
| TDS (ppm)                          | APHA, 1998             | 2.78×10 <sup>7</sup> ±0.15 |
| <b>Cation (mg/l) /Anion (mg/l)</b> |                        |                            |
| Chloride                           | IS:1760(P-5)           | 4423.6 ±20.0               |
| Sulfate                            | EPA-9038-1             | 195.6 ±1.80                |
| Sulfide                            | APHA 4500-S 2- F :2012 | 5.0 ±0.10                  |
| Aluminum                           | APHA3111(B)            | 145 ±2.20                  |
| Cobalt                             | APHA3111(B)            | 0.50 ±0.09                 |
| Chromium                           | EPA SW 846-7190        | <0.01 ±0.00                |
| Copper                             | EPA SW 846-7210        | 11.20 ±0.09                |
| <b>Elemental Analysis (%)</b>      |                        |                            |
| Iron                               | IS:1527-1972           | 47.82 ±0.9                 |
| Aluminum                           | IS:1527-1972           | 4.56 ±0.01                 |
| Sulfur                             | Is:1350(P-3)           | 2.75 ±0.05                 |
| <b>CHNS Analysis (%)</b>           |                        |                            |
| Carbon                             | IS:1760(P-5)           | 46.81 ±0.50                |
| Hydrogen                           | IS:1350(P-4/sec1)      | 4.21 ±0.02                 |
| Nitrogen                           | IS:1350(P-4/sec2)      | 2.10 ±0.01                 |
| Sulfur                             | IS:1350(P-3)           | 2.72 ±0.01                 |

All the listed testing's performed in triplicate. The data points are average of the triplicate ± standard deviation (less than 5% of average).

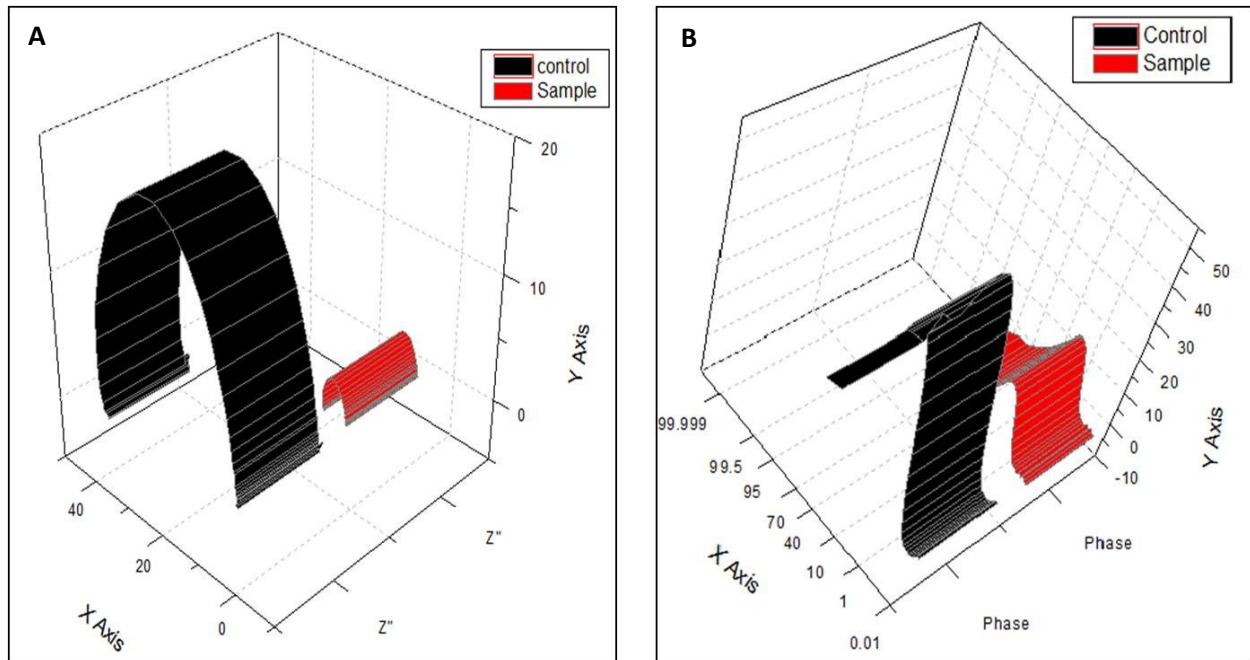

**Fig .S1.** (A) 3D spectra of Nyquist plot depicted the area covered by biotic system is much smaller than the area covered by abiotic system (B) 3D spectra of Bode plot illustrated the peak of biotic system is smaller than abiotic system.
